# Supplementary material for: Metformin inhibits lithocholic acid-induced interleukin 8 upregulation in colorectal cancer cells by suppressing ROS production and NF-kB activity
Source: PubMed Central journal article supplement (PMC6376015; doi:10.1038/s41598-019-38778-2), 2019-02-14

**Full-length gels and blots**

**Metformin inhibits lithocholic acid-induced interleukin 8 upregulation in colorectal cancer cells by suppressing ROS production and NF- $\kappa$ B activity**

Thi Thinh Nguyen<sup>1\*</sup>, Trong Thuan Ung<sup>1\*</sup>, Shinan Li<sup>1</sup>, Sen Lian<sup>2</sup>, Yong Xia<sup>3</sup>, Sun Young Park<sup>1</sup> and Young Do Jung<sup>1\*\*</sup>

<sup>1</sup>Department of Biochemistry, Chonnam National University Medical School, Seoyang Ro 264, Hwasun, Jeonnam 58138, Korea

<sup>2</sup>Department of Biochemistry and Molecular Biology, School of Basic Medical Sciences, Southern Medical University, Guangzhou, 510515, Guangdong, China

<sup>3</sup>Department of Urology, New York University School of Medicine, New York, NY, 10010, USA

**\*\*Corresponding author:** Young Do Jung, MD., PhD.

Department of Biochemistry, Chonnam National University Medical School, Seoyang Ro 264, Hwasun, Jeonnam 58138, Korea; Telephone: 82-61-379-2772, Fax: 82-81-379-2781, Email: [ydjung@chonnam.ac.kr](mailto:ydjung@chonnam.ac.kr)

\* These authors contributed equally to this work

Full-length scans of the western blots presented in Figure 2A in the main text

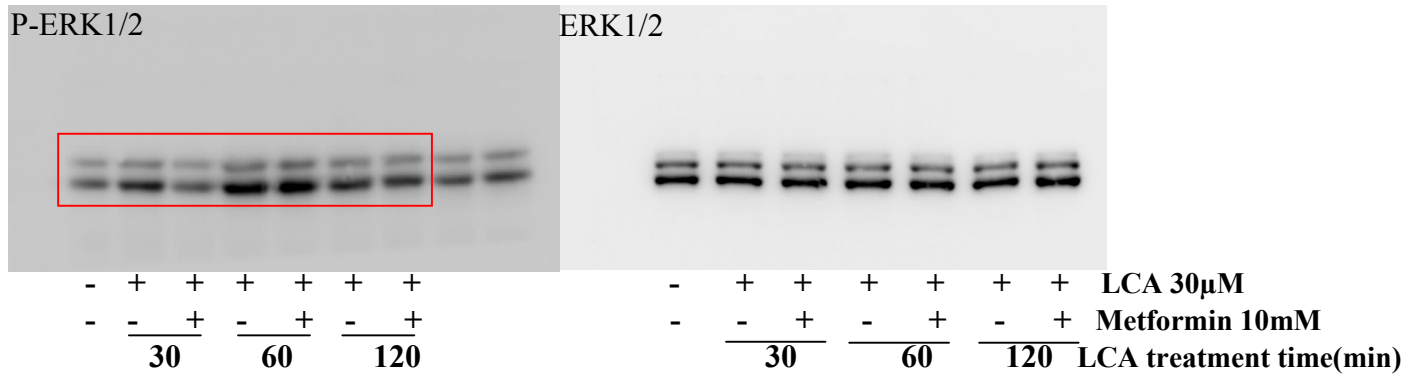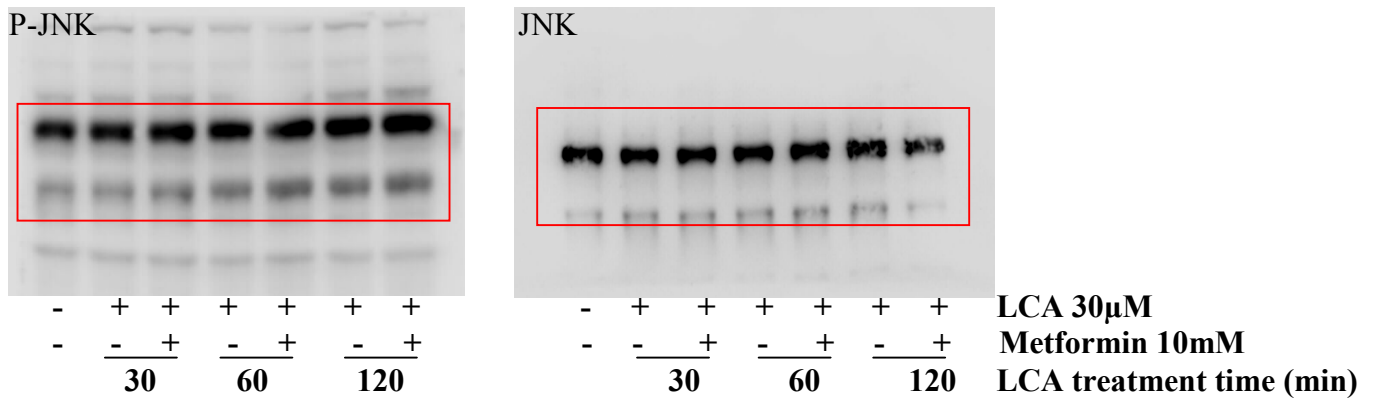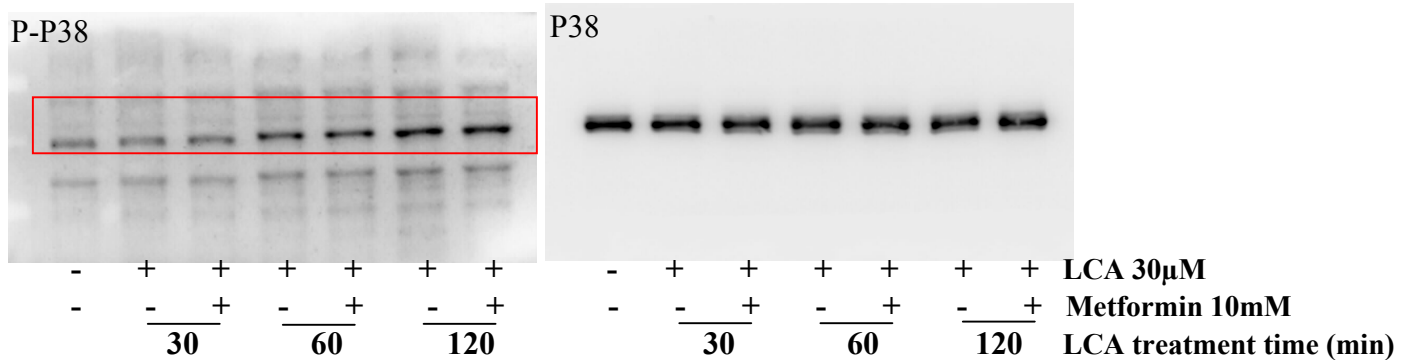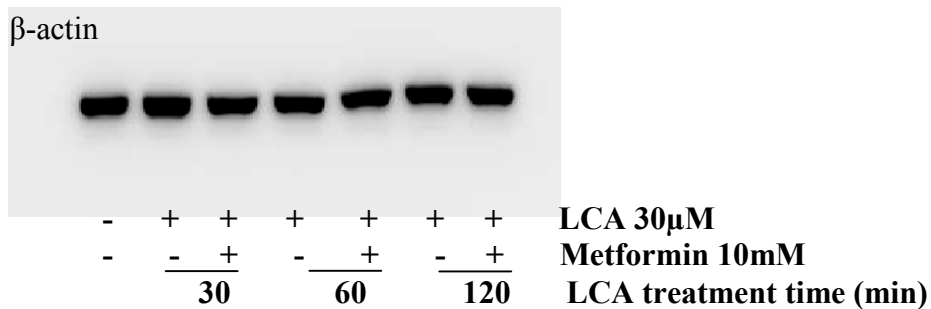

**Full-length scans of the blots presented in Figure 2D in the main text**

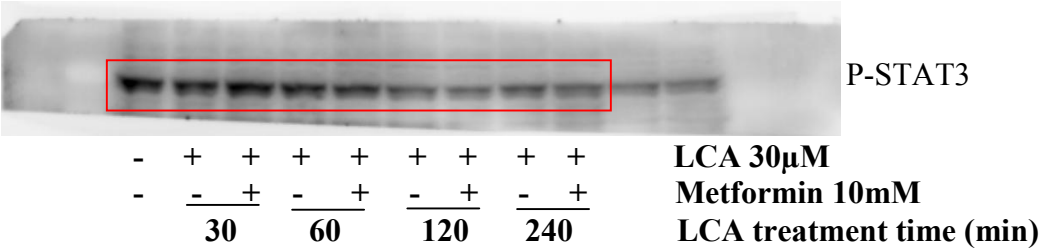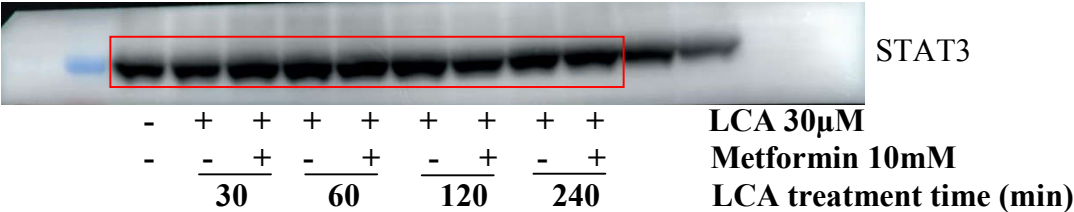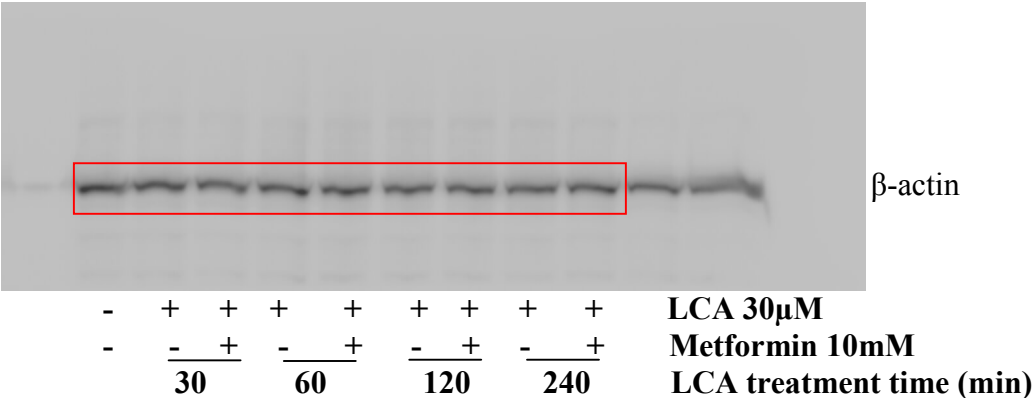

Full-length scans of the blots presented in Figure 3D in the main text

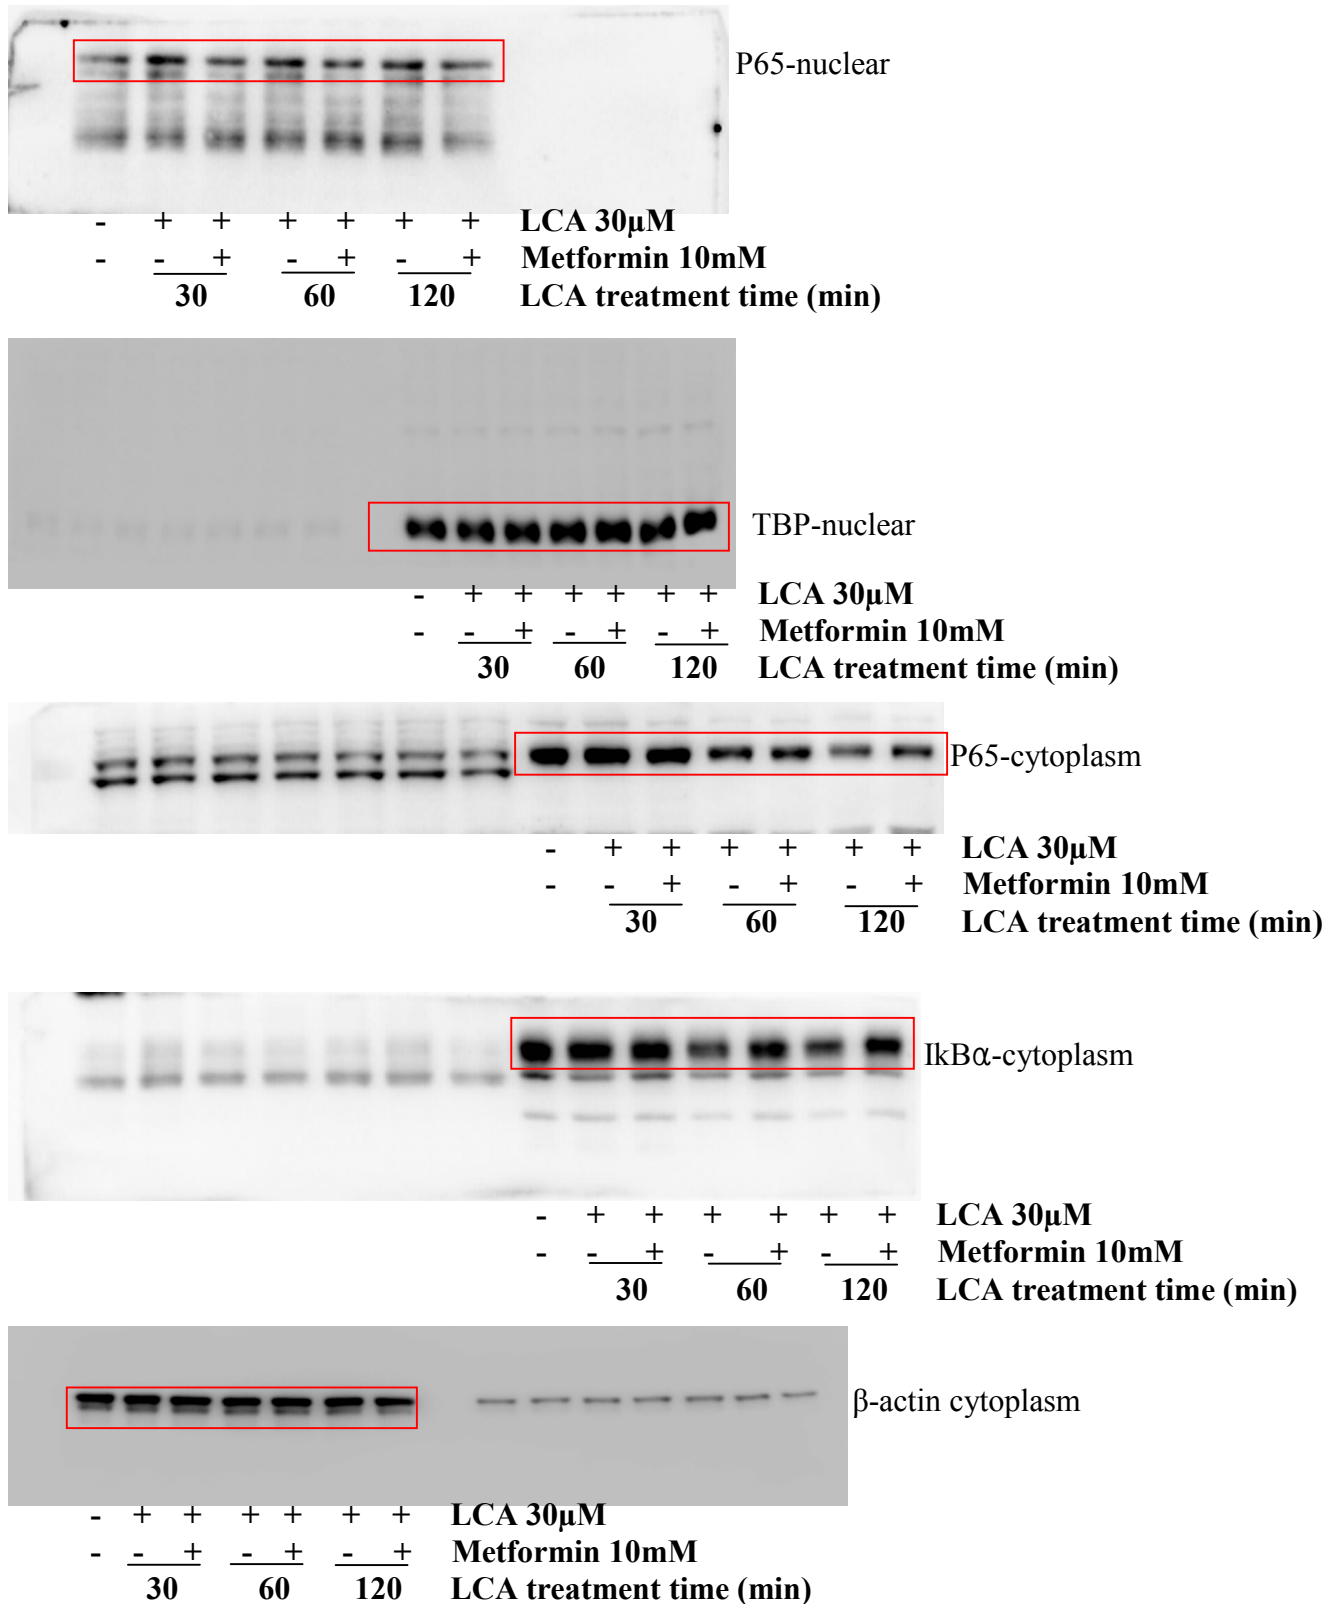

Agarose gels presented in Figure 1 in the main text

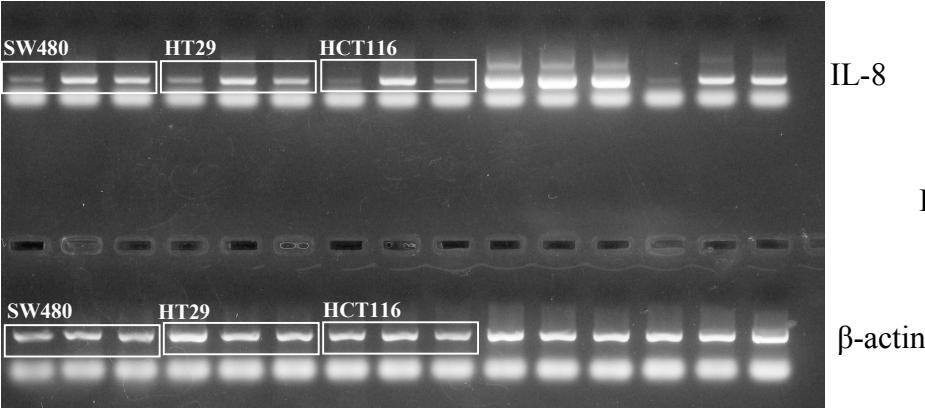

Figure 1A

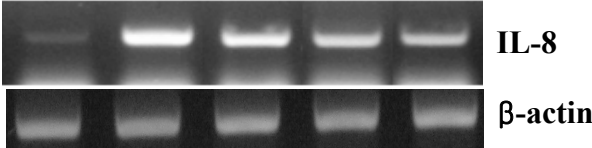

Figure 1B

|   |   |   |    |    |                |
|---|---|---|----|----|----------------|
| - | + | + | +  | +  | LCA 30µM       |
| - | - | 5 | 10 | 20 | Metformin (mM) |

Agarose gels presented in Figure 3 in the main text

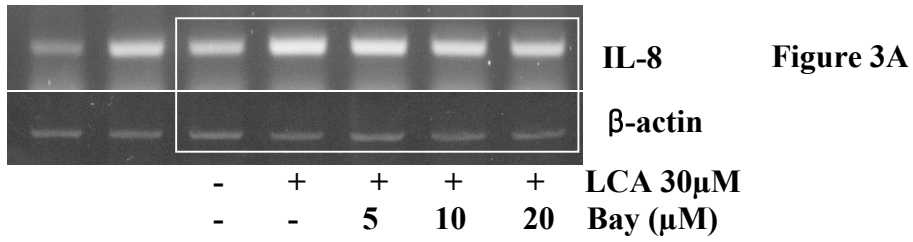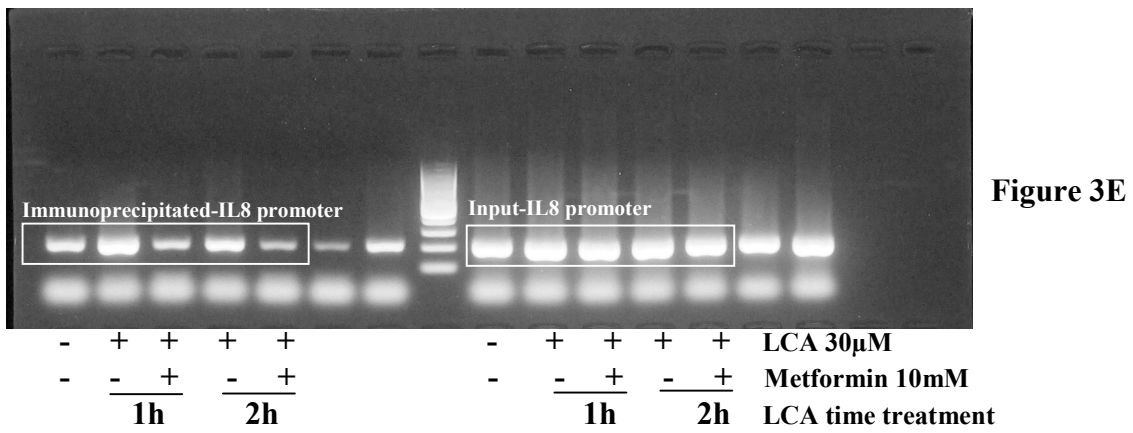

Agarose gels presented in Figure 5C in the main text

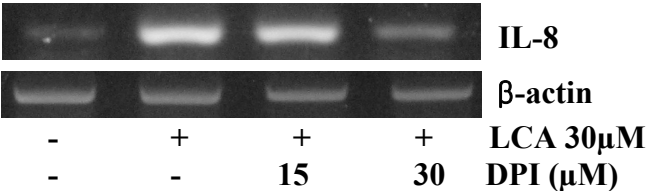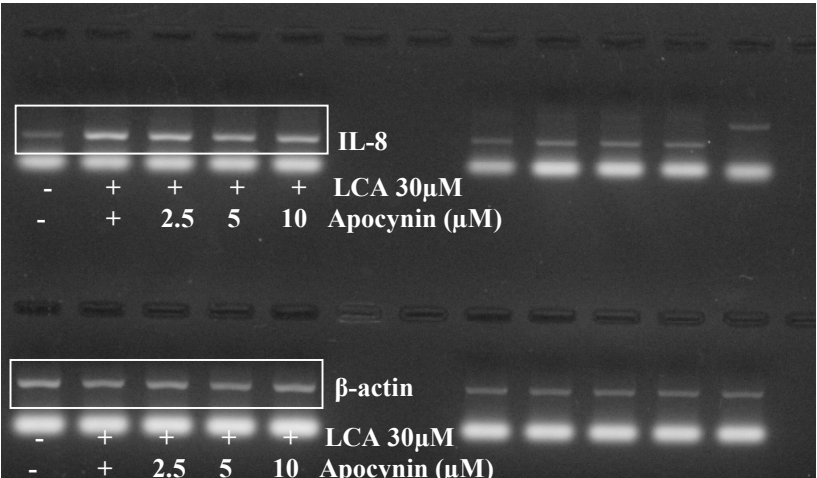

Supplement: 41598_2019_38778_MOESM2_ESM.pdf [file 41598_2019_38778_MOESM2_ESM.pdf]
